# Supplementary material for: Analysis of Hypoxic and Hypercapnic Ventilatory Response in Healthy Volunteers
Source: PLoS One. 2017 Jan 3;12(1):e0168930. doi: 10.1371/journal.pone.0168930 (PMC5207520; doi:10.1371/journal.pone.0168930)
Supplement: S1 Table — (XLSX) [file pone.0168930.s001.xlsx]

## Sheet: Sheet1
	Supplementary table 1. Association of genetic polymorphisms with hypoxia and hypercapnia.
		Association of tag SNPs with hypercapnia
	GPR4	rsid	position	alleleA	alleleB	info	frequency AA	frequency AB	frequency BB	N total	MAF	p-value	beta	se
		rs3745820	46094597	G	A	0.93007	88.8723	61.7546	10.3731	161	0.256214	0.595722	0.0715871	0.13465
		rs10405576	46098885	A	G	1	75	75	11	161	0.301242	0.243283	0.152083	0.129847
		rsid	position	alleleA	alleleB	info	frequency AA	frequency AB	frequency BB	N total	MAF	p-value	beta	se
	PHOX2B	rs4861132	41734321	A	C	0.998587	114.068	37.932	8	160	0.168538	0.155805	-0.198756	0.139355
		rs11731281	41736897	A	C	1	113	39	8	160	0.171875	0.22112	-0.170433	0.138732
		rs7675078	41737972	T	C	1	113	39	8	160	0.171875	0.22112	-0.170433	0.138732
		rs6850846	41738733	T	A	1	80	66	14	160	0.29375	0.0895744	-0.208914	0.12229
		rs7689304	41742961	G	C	0.982789	70.8428	74.0092	15.148	160	0.325954	0.219908	-0.152276	0.123626
		rs6826373	41746460	C	T	0.979569	68.224	74.754	17.022	160	0.339994	0.265677	-0.135956	0.121704
		rs4608840	41749938	C	T	0.97876	81.591	64.318	14.091	160	0.289063	0.183303	-0.164524	0.123089
		rs9654074	41757332	T	C	0.987717	70.169	73.79	16.041	160	0.33085	0.414144	-0.100159	0.12232
		rsid	position	alleleA	alleleB	info	frequency AA	frequency AB	frequency BB	N total	MAF	p-value	beta	se
	TASK2/KCNK5	rs724650	39148595	C	G	0.937741	95.5239	53.4731	11.003	160	0.235872	0.477728	-0.0945142	0.132803
		rs9394577	39149784	T	C	0.98305	87.6501	60.1809	12.169	160	0.264122	0.43359	0.0992287	0.126389
		rs1428373	39150098	G	A	0.96876	60.6561	72.3428	27.0011	160	0.394828	0.626281	0.0561473	0.11507
		rs2815093	39151166	C	T	1	13	55	92	160	0.253125	0.128998	0.187131	0.122613
		rs9470995	39153541	C	T	0.962979	44.7746	69.1814	46.044	160	0.496033	0.968391	-0.00430046	0.108351
		rs6912288	39157781	A	C	0.994467	29.1	74.668	56.232	160	0.415213	0.328166	0.110573	0.112725
		rs3778448	39163201	A	G	0.99421	80.959	62.986	16.055	160	0.297175	0.24073	-0.143228	0.121619
		rs751933	39164121	T	C	0.99964	31.029	73.971	55	160	0.425091	0.280872	0.121272	0.112067
		rs12207689	39166496	T	C	0.999727	80.984	67.016	12	160	0.284425	0.634282	-0.060744	0.127439
		rs2561432	39168970	A	C	0.999954	80.999	68.003	10.998	160	0.281247	0.0770629	0.227255	0.127683
		rs2815106	39169414	C	T	1	81	68	11	160	0.28125	0.0770119	0.227281	0.127676
		rs2815110	39171014	A	C	0.995557	27.262	73.915	58.823	160	0.401372	0.123061	0.174168	0.11233
		rs733701	39171862	C	T	0.996558	92.774	57.229	9.997	160	0.241322	0.360878	-0.120705	0.131716
		rs2815113	39177853	C	T	1	77	70	13	160	0.3	0.0687338	0.227497	0.124117
		rs2815114	39185605	G	A	0.986179	59.096	75.742	25.162	160	0.393956	0.113501	0.182556	0.114696
		rs2561399	39186928	C	G	0.9626	92.616	60.4491	6.93491	160	0.232247	0.683323	0.0571193	0.139758
		rs2815116	39187886	G	A	0.983359	10.096	71.101	78.803	160	0.285291	0.0900017	0.225198	0.132
		rs2815118	39190287	T	A	1	76	71	13	160	0.303125	0.037837	0.260768	0.124498
		rs2815121	39191894	G	A	1	14	62	84	160	0.28125	0.912435	-0.0136147	0.123605
		rs2815122	39192366	T	C	1	51	75	34	160	0.446875	0.932104	-0.00955511	0.111969
		rs11752800	39193418	G	A	0.872731	64.4138	76.041	19.5452	160	0.359786	0.577105	-0.0722298	0.129259
		rs2434581	39202106	C	T	1	79	67	14	160	0.296875	0.671699	-0.0524136	0.123435
		rs9366999	39202157	G	A	1	71	71	18	160	0.334375	0.55861	-0.0698661	0.11919
		Association of coding variants with hypercapnia
	GPR4
		rsid	position	alleleA	alleleB	info	frequency AA	frequency AB	frequency BB	N total	MAF	p-value	beta	se
		rs3745820	46094597	G	A	0.929608	88.8573	60.7696	10.3731	160	0.254737	0.406717	0.110904	0.133306
		rsid	position	alleleA	alleleB	info	frequency AA	frequency AB	frequency BB	N total	MAF	p-value	beta	se
	PHOX2B	rs4861132	41734321	A	C	0.998587	114.068	37.932	8	160	0.168538	0.155805	-0.198756	0.139355
		rs11731281	41736897	A	C	1	113	39	8	160	0.171875	0.22112	-0.170433	0.138732
		rs7675078	41737972	T	C	1	113	39	8	160	0.171875	0.22112	-0.170433	0.138732
		rs6850846	41738733	T	A	1	80	66	14	160	0.29375	0.0895744	-0.208914	0.12229
		rs7689304	41742961	G	C	0.982789	70.8428	74.0092	15.148	160	0.325954	0.219908	-0.152276	0.123626
		rs6826373	41746460	C	T	0.979569	68.224	74.754	17.022	160	0.339994	0.265677	-0.135956	0.121704
		rs4608840	41749938	C	T	0.97876	81.591	64.318	14.091	160	0.289063	0.183303	-0.164524	0.123089
		rs9654074	41757332	T	C	0.987717	70.169	73.79	16.041	160	0.33085	0.414144	-0.100159	0.12232
	TASK2/KCNK5
		rsid	position	alleleA	alleleB	info	frequency AA	frequency AB	frequency BB	N total	MAF	p-value	beta	se
		rs150380866	39159379	G	A	0.764115	158.362	1.638	0	160	0.00511875	0.0284688	1.97288	0.892124
		rs13208158	39159407	G	A	0.999661	153.998	6.002	0	160	0.0187562	0.783555	-0.115144	0.418451
		rs142043367	39162068	C	T	0.982493	157.964	2.036	0	160	0.0063625	0.323777	-0.77467	0.782592
		Association of tag SNPs with hypoxia
	GPR4	rsid	position	alleleA	alleleB	info	frequency AA	frequency AB	frequency BB	N total	MAF	p-value	beta	se
		rs3745820	46094597	G	A	0.931583	111.527	71.4351	12.0375	195	0.244898	0.0745049	0.217117	0.121067
		rs10405576	46098885	A	G	1	96	85	14	195	0.289744	0.137047	0.171538	0.11488
		rsid	position	alleleA	alleleB	info	frequency AA	frequency AB	frequency BB	N total	MAF	p-value	beta	se
		rs4861132	41734321	A	C	0.998767	142.068	44.932	8	195	0.156236	0.439112	-0.103421	0.13339
	PHOX2B	rs11731281	41736897	A	C	1	141	46	8	195	0.158974	0.411297	-0.109871	0.133431
		rs7675078	41737972	T	C	0.998475	141.087	45.913	8	195	0.158751	0.409731	-0.110364	0.133582
		rs6850846	41738733	T	A	1	98	80	17	195	0.292308	0.463313	-0.0827219	0.112564
		rs7689304	41742961	G	C	0.984747	85.9468	90.9142	18.139	195	0.326134	0.702536	-0.0433808	0.113421
		rs6826373	41746460	C	T	0.98243	84.347	89.723	20.93	195	0.337392	0.46242	-0.08121	0.110286
		rs4608840	41749938	C	T	0.981817	99.541	78.378	17.081	195	0.288564	0.452712	-0.0841273	0.111805
		rs9654074	41757332	T	C	0.989114	87.165	87.793	20.042	195	0.32789	0.760962	-0.0335622	0.110164
		rsid	position	alleleA	alleleB	info	frequency AA	frequency AB	frequency BB	N total	MAF	p-value	beta	se
		rs724650	39148595	C	G	0.935956	118.637	62.5678	13.795	195	0.231174	0.969719	-0.00450469	0.118512
	TAS2/KCNK5	rs9394577	39149784	T	C	0.977751	110.762	71.7999	12.438	195	0.247887	0.317309	0.117742	0.117431
		rs1428373	39150098	G	A	0.963605	77.4271	88.4417	29.1311	195	0.376164	0.80627	0.0257042	0.104666
		rs2815093	39151166	C	T	1	17	78	100	195	0.287179	0.146634	0.160042	0.109807
		rs9470995	39153541	C	T	0.961193	57.3396	88.4924	49.168	195	0.479047	0.596646	0.0524759	0.0989883
		rs6912288	39157781	A	C	0.992231	36.078	91.85	67.072	195	0.420528	0.840095	0.0204952	0.101437
		rs3778448	39163201	A	G	0.994471	98.909	78.033	18.058	195	0.29269	0.197331	-0.142336	0.110021
		rs751933	39164121	T	C	0.999471	37.006	93.994	64	195	0.430785	0.605882	0.0525674	0.101713
		rs12207689	39166496	T	C	0.999768	100.984	83.016	11	195	0.269272	0.376516	0.105654	0.119193
		rs2561432	39168970	A	C	0.99967	91.005	93.979	10.016	195	0.292336	0.87388	-0.0193544	0.121767
		rs2815106	39169414	C	T	1	91	92	12	195	0.297436	0.904208	-0.0142967	0.118637
		rs2815110	39171014	A	C	0.997742	32.006	95.193	67.801	195	0.408218	0.318978	0.103709	0.103794
		rs733701	39171862	C	T	0.996879	111.793	70.21	12.997	195	0.246677	0.323998	-0.114813	0.116108
		rs2815113	39177853	C	T	1	85	98	12	195	0.312821	0.994085	0.000888916	0.11975
		rs2815114	39185605	G	A	0.985435	63.089	101.422	30.489	195	0.41641	0.820417	0.0243776	0.107238
		rs2561399	39186928	C	G	0.972184	106.643	81.1481	7.20891	195	0.245041	0.901787	-0.0159188	0.128825
		rs2815116	39187886	G	A	0.981989	17.04	81.791	96.169	195	0.297105	0.240378	0.131442	0.111606
		rs2815118	39190287	T	A	1	86	97	12	195	0.310256	0.68112	0.0491274	0.119366
		rs2815121	39191894	G	A	1	20	77	98	195	0.3	0.519624	0.0694702	0.107685
		rs2815122	39192366	T	C	1	61	94	40	195	0.446154	0.396949	-0.0860313	0.101332
		rs11752800	39193418	G	A	0.857684	78.1212	90.5582	26.3205	195	0.367178	0.780858	0.0320556	0.115061
		rs2434581	39202106	C	T	1	99	79	17	195	0.289744	0.566424	0.0641721	0.111734
		rs9366999	39202157	G	A	1	91	81	23	195	0.325641	0.790424	0.0282751	0.106244
		Association of coding variants with hypoxia
	GPR4
		rsid	position	alleleA	alleleB	info	frequency AA	frequency AB	frequency BB	N total	MAF	p-value	beta	se
		rs3745820	46094597	G	A	0.931583	111.527	71.4351	12.0375	195	0.244898	0.0745049	0.217117	0.121067
	PHOX2B	rsid	position	alleleA	alleleB	info	frequency AA	frequency AB	frequency BB	N total	MAF	p-value	beta	se
		rs17885864	41747899	G	T	0.954551	184.806	10.1938	0	195	0.026138	0.700726	-0.126924	0.32974
		rs17885216	41748217	G	A	0.952098	189.618	5.382	0	195	0.0138	0.792351	-0.119279	0.45245
	TASK2/KCNk5
		rsid	position	alleleA	alleleB	info	frequency AA	frequency AB	frequency BB	N total	MAF	p-value	beta	se
		rs150380866	39159379	G	A	0.709218	193.209	1.791	0	195	0.00459231	0.77469	0.256247	0.893925
		rs13208158	39159407	G	A	0.99942	187.996	7.004	0	195	0.017959	0.972597	-0.0132395	0.384904
		The variants were selected to tag variation within coding region and 5kb up and downstream using Hapmap multimarker tagging in CEU population. MAF=minor allele frequency, allele B= effect allele, info=imputation accuracy. Coding variants with more than 2 copies are shown and those with info<0.5 were excluded.
